# Supplementary material for: Antidiabetic Potency, Antioxidant Effects, and Mode of Actions ofCitrus reticulataFruit Peel Hydroethanolic Extract, Hesperidin, and Quercetin in Nicotinamide/Streptozotocin-Induced Wistar Diabetic Rats
Source: Hindawi journal article supplement (doi:10.1155/2020/1730492), 2020-06-22

## Graphical abstract:

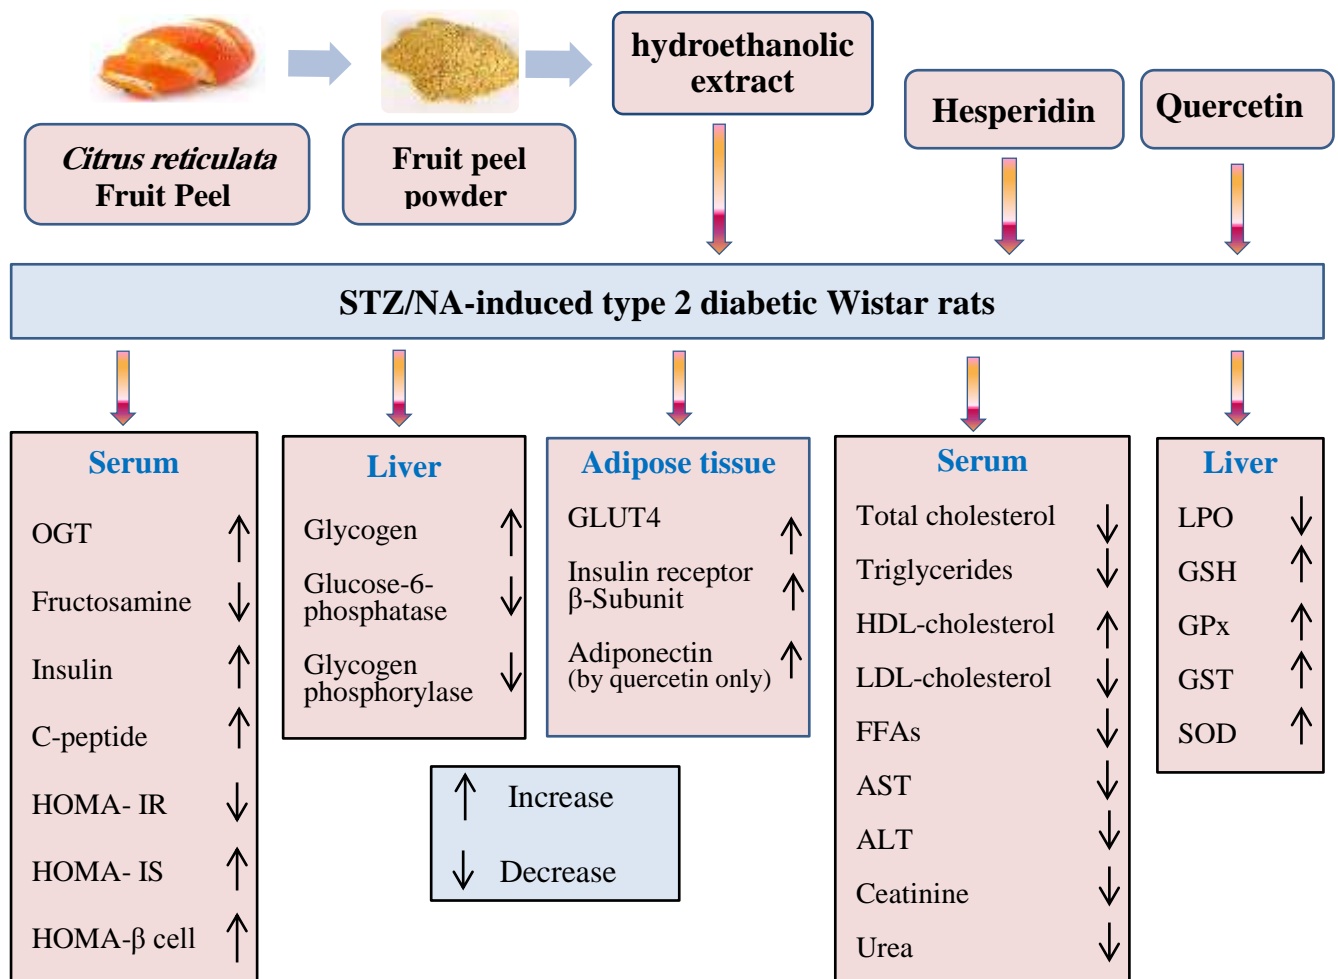

Supplement: f1 [file 1730492.f1.pdf]
